# Supplementary material for: Combined immunotherapy with nivolumab and ipilimumab with and without local therapy in patients with melanoma brain metastasis: a DeCOG* study in 380 patients
Source: PubMed Central journal article supplement — J Immunother Cancer. 2020 Mar 26;8(1):e000333. doi: 10.1136/jitc-2019-000333 (PMC7206917; doi:10.1136/jitc-2019-000333), 2020-03-26
Supplement: jitc-2019-000333supp001.pdf [file jitc-2019-000333supp001.pdf]

## Supplementary files

Table S1: Analysis of patients' characteristics (n= 310) considering treatment with local therapy (STR/surgery) at any time point.

| Patients' characteristics                     | STR/surgery <sup>(1)</sup> | No STR/surgery | p value <sup>+</sup> |
|-----------------------------------------------|----------------------------|----------------|----------------------|
|                                               | N (%)                      |                |                      |
| <b>Gender</b>                                 |                            |                |                      |
| Male                                          | 132 (60)                   | 59 (65.6)      | 0.361                |
| Female                                        | 88 (40)                    | 31 (34.4)      |                      |
| <b>Age at the time of CombiIT</b>             |                            |                |                      |
| <54y                                          | 90 (40.9)                  | 30 (33.3)      | 0.095                |
| 54y-64y                                       | 63 (28.6)                  | 21 (23.3)      |                      |
| >64y                                          | 67 (30.5)                  | 39 (43.3)      |                      |
| <b>BRAF status</b>                            |                            |                |                      |
| BRAF wild-type                                | 82 (37.3)                  | 32 (35.6)      | 0.776                |
| BRAF mutant                                   | 138 (62.7)                 | 58 (64.4)      |                      |
| <b>LDH level*</b>                             |                            |                |                      |
| Normal                                        | 120 (57.1)                 | 39 (44.3)      | 0.124                |
| Elevated                                      | 68 (32.4)                  | 38 (43.2)      |                      |
| 2x >ULN                                       | 22 (10.5)                  | 11 (12.5)      |                      |
| <b>S100 level*</b>                            |                            |                |                      |
| Normal                                        | 77 (41)                    | 17 (20)        | <b>0.003</b>         |
| Elevated                                      | 76 (40.4)                  | 49 (57.6)      |                      |
| 10x >ULN                                      | 35 (18.6)                  | 19 (22.4)      |                      |
| <b>Number of MBM at the time of Combi IT*</b> |                            |                |                      |
| 1 to 3                                        | 118 (57.3)                 | 41 (47.1)      | 0.111                |
| >3                                            | 88 (42.7)                  | 46 (52.9)      |                      |
| <b>ECOG PS*</b>                               |                            |                |                      |

|                              |            |           |              |
|------------------------------|------------|-----------|--------------|
| 0                            | 147 (67.4) | 62 (70.5) | 0.821        |
| 1                            | 52 (23.9)  | 20 (22.7) |              |
| >1                           | 19 (8.7)   | 6 (6.8)   |              |
| <b>Presence of symptoms*</b> |            |           |              |
| No                           | 68 (63.6)  | 42 (84)   | <b>0.009</b> |
| Yes                          | 39 (36.4)  | 8 (16)    |              |

N= number of patients in each subgroup; CombilT= ipilimumab plus nivolumab; ULN = upper level normal; MBM = melanoma brain metastases; ECOG PS = Eastern Cooperative Oncology Group performance status. Bold values indicate statistically significant results. Patients treated with whole brain radiotherapy were excluded from this analysis. <sup>(1)</sup> Ten patients (4.5%) of the STR/surgery group (n=220) received only surgery. Four patients receiving STR/surgery before combined immunotherapy and two patients receiving STR/surgery after combined immunotherapy were treated with the two technics within an interval of two weeks. \* Denotes variables for which the missing/unknown values were excluded from the analysis. + Pearson chi-square test.

Table S2: Analysis of patients' characteristics (n= 220) considering the timing of local therapy: before combined immunotherapy (STR/surgery upfront) or after combined immunotherapy (STR/surgery later))

| <b>Patients' characteristics</b>  | <b>STR/surgery upfront</b> | <b>STR/surgery later</b> | <b>p value<sup>+</sup></b> |
|-----------------------------------|----------------------------|--------------------------|----------------------------|
|                                   | N (%)                      |                          |                            |
| <b>Gender</b>                     |                            |                          |                            |
| Male                              | 93 (57.1)                  | 39 (68.4)                | 0.132                      |
| Female                            | 70 (42.9)                  | 18 (31.6)                |                            |
| <b>Age at the time of CombilT</b> |                            |                          |                            |
| <54y                              | 62 (38)                    | 28 (49.1)                | 0.252                      |
| 54y-64y                           | 47 (28.8)                  | 16 (28.1)                |                            |
| >64y                              | 54 (33.1)                  | 13 (22.8)                |                            |
| <b>BRAF status</b>                |                            |                          |                            |
| BRAF wild-type                    | 66 (40.5)                  | 16 (28.1)                | 0.095                      |
| BRAF mutant                       | 97 (59.5)                  | 41 (71.9)                |                            |
| <b>LDH level*</b>                 |                            |                          |                            |
| Normal                            | 83 (53.5)                  | 37 (67.3)                | 0.141                      |

|                                              |           |           |       |
|----------------------------------------------|-----------|-----------|-------|
| Elevated                                     | 56 (36.2) | 12 (21.8) |       |
| 2x >ULN                                      | 16 (10.3) | 6 (10.9)  |       |
| <b>S100 level*</b>                           |           |           |       |
| Normal                                       | 56 (40.3) | 21 (42.9) | 0.884 |
| Elevated                                     | 56 (40.3) | 20 (40.1) |       |
| 10x >ULN                                     | 27 (19.4) | 8 (16.3)  |       |
| <b>Number of MBM at the time of CombiIT*</b> |           |           |       |
| 1 to 3                                       | 83 (55)   | 35 (63.6) | 0.266 |
| >3                                           | 68 (45)   | 20 (36.4) |       |
| <b>ECOG PS*</b>                              |           |           |       |
| 0                                            | 103 (64)  | 44 (77.2) | 0.125 |
| 1                                            | 41 (25.5) | 11 (19.3) |       |
| >1                                           | 17 (10.5) | 2 (3.5)   |       |
| <b>Presence of symptoms*</b>                 |           |           |       |
| No                                           | 46 (62.2) | 22 (66.7) | 0.655 |
| Yes                                          | 28 (37.9) | 11 (33.3) |       |

N= number of patients in each subgroup; CombiIT= ipilimumab plus nivolumab; ULN = upper level normal; MBM = melanoma brain metastases; ECOG PS = Eastern Cooperative Oncology Group performance status. \* Denotes variables for which the missing/unknown values were excluded from the analysis. + Pearson chi-square test.

Table S3: Analysis of patients with BRAFV600 mutated melanoma (n= 221) considering the type of first line therapy.

|                                   | <b>First-line BRAFi/MEKi</b> | <b>First-line CombiIT</b> | <b>p value<sup>+</sup></b> |
|-----------------------------------|------------------------------|---------------------------|----------------------------|
| <b>Gender</b>                     | N (%)                        |                           |                            |
| Male                              | 51 (61.4)                    | 96 (69.6)                 | 0.215                      |
| Female                            | 32 (38.6)                    | 42 (30.4)                 |                            |
| <b>Age at the time of CombiIT</b> |                              |                           |                            |
| <54y                              | 43 (51.8)                    | 60 (43.5)                 | 0.126                      |
| 54y-64y                           | 25 (30.1)                    | 36 (18.1)                 |                            |

|                                             |           |            |              |
|---------------------------------------------|-----------|------------|--------------|
| >64y                                        | 15 (18.1) | 42 (30.4)  |              |
| <b>LDH level*</b>                           |           |            |              |
| Normal                                      | 33 (41.3) | 70 (52.2)  | 0.298        |
| Elevated                                    | 36 (45)   | 49 (36.6)  |              |
| 2x >ULN                                     | 11 (13.8) | 15 (11.2)  |              |
| <b>S100 level*</b>                          |           |            |              |
| Normal                                      | 28 (38.4) | 38 (30.6)  | 0.147        |
| Elevated                                    | 36 (49.3) | 57 (46)    |              |
| 10x >ULN                                    | 9 (12.3)  | 29 (23.4)  |              |
| <b>Number of MBM at the time of CombiT*</b> |           |            |              |
| 1 to 3                                      | 21 (26.9) | 64 (49.2)  | <b>0.002</b> |
| >3                                          | 57 (73.1) | 66 (50.8)  |              |
| <b>ECOG PS*</b>                             |           |            |              |
| 0                                           | 55 (67.1) | 102 (74.5) | 0.387        |
| 1                                           | 17 (20.7) | 25 (12.3)  |              |
| >1                                          | 10 (12.2) | 10 (7.3)   |              |
| <b>Presence of symptoms*</b>                |           |            |              |
| No                                          | 25 (67.6) | 55 (70.5)  | 0.748        |
| Yes                                         | 12 (32.4) | 23 (29.5)  |              |

Patients that received first-line PD-1 monotherapy (n=19) or chemotherapy (n=2) were excluded in this table. N= number of patients in each subgroup; CombiT= nivolumab plus ipilimumab; ULN = upper level normal; MBM = melanoma brain metastases; ECOG PS = Eastern Cooperative Oncology Group performance status. Bold values indicate statistically significant results ( $p < 0.05$ ). \*Denotes variables for which the missing/unknown values were excluded from the analysis. † Pearson chi-square test.

Table S4: Impact of baseline patient and disease characteristics on overall survival - univariate and multivariate Cox regression analysis. In this multivariate Cox regression analysis age, LDH level and S100B level were analyzed as numerical variables.

|  | Total | Univariate analysis |  | Multivariate analysis |  |
|--|-------|---------------------|--|-----------------------|--|
|--|-------|---------------------|--|-----------------------|--|

|                                              | N (%)      | HR (death)<br>(95% CI) | p value           | HR (death)<br>(95% CI) | p value      |
|----------------------------------------------|------------|------------------------|-------------------|------------------------|--------------|
| <b>Gender</b>                                |            |                        |                   |                        |              |
| Male                                         | 240 (63.2) | 1                      |                   | 1                      |              |
| Female                                       | 140 (36.8) | 0.94 (0.69-1.27)       | 0.682             | 1.06 (0.70-1.60)       | 0.79         |
| <b>Age at the time of CombilT</b>            |            |                        |                   |                        |              |
| <54y                                         | 153 (40.3) | 1                      | 0.616             | 1.02 (0.99-1.02)       | 0.421        |
| 54y-64y                                      | 105 (27.6) | 1.13 (0.78-1.62)       |                   |                        |              |
| >64y                                         | 122 (32.1) | 1.19 (0.83-1.70)       |                   |                        |              |
| <b>BRAF status</b>                           |            |                        |                   |                        |              |
| BRAF wild-type                               | 138 (36.3) | 1                      | 0.962             | 1                      |              |
| BRAF mutant                                  | 242 (63.7) | 0.99 (0.72-1.37)       |                   | 1.01 (0.65-1.58)       | 0.95         |
| <b>LDH level*</b>                            |            |                        |                   |                        |              |
| Normal                                       | 189 (51.4) | 1                      | <b>&lt;0.0001</b> | 1.001 (1.00-1.001)     | <b>0.001</b> |
| Elevated                                     | 133 (36.1) | 1.24 (0.88-1.74)       |                   |                        |              |
| 2x >ULN                                      | 46 (12.5)  | 2.53 (1.67-3.83)       |                   |                        |              |
| <b>S100B level*</b>                          |            |                        |                   | 1.002 (1.001-1.003)    | <b>0.001</b> |
| Normal                                       | 109 (32.8) | 1                      | 0.099             |                        |              |
| Elevated                                     | 156 (47)   | 1.35 (0.92-2.00)       |                   |                        |              |
| 10x >ULN                                     | 67 (20.2)  | 1.61 (1.02-2.54)       |                   |                        |              |
| <b>Number of MBM at the time of CombilT*</b> |            |                        |                   |                        |              |
| 1 to 3                                       | 167 (46.8) | 1                      | <b>0.001</b>      | 1                      | <b>0.017</b> |
| >3                                           | 190 (53.2) | 1.74 (1.26-2.40)       |                   | 1.67 (1.09-2.55)       |              |
| <b>ECOG PS*</b>                              |            |                        |                   |                        |              |
| 0                                            | 249 (66.4) | 1                      | <b>0.001</b>      | 1                      | <b>0.041</b> |
| 1                                            | 87 (23.2)  | 1.3 (0.91-1.87)        |                   | 1.06 (0.63-1.76)       | 0.832        |

|                              |           |                  |       |                  |              |
|------------------------------|-----------|------------------|-------|------------------|--------------|
| >1                           | 39 (10.4) | 2.58 (1.66-4.00) |       | 2.13 (1.18-3.84) | <b>0.012</b> |
| <b>Presence of symptoms*</b> |           |                  |       |                  |              |
| No                           | 133 (69)  | 1                |       |                  |              |
| Yes                          | 60 (31)   | 1.46 (0.96-2.23) | 0.078 | N/A              |              |

N= number of patients in each subgroup; CombiT= ipilimumab plus nivolumab; ULN = upper level normal; MBM = melanoma brain metastases; ECOG PS = Eastern Cooperative Oncology Group performance status; N/A: not evaluated, since this information was available for only 50% of the patients. Bold values indicate statistically significant results. \*Denotes variables for which the missing/unknown values were excluded from the analysis.

Figure S1

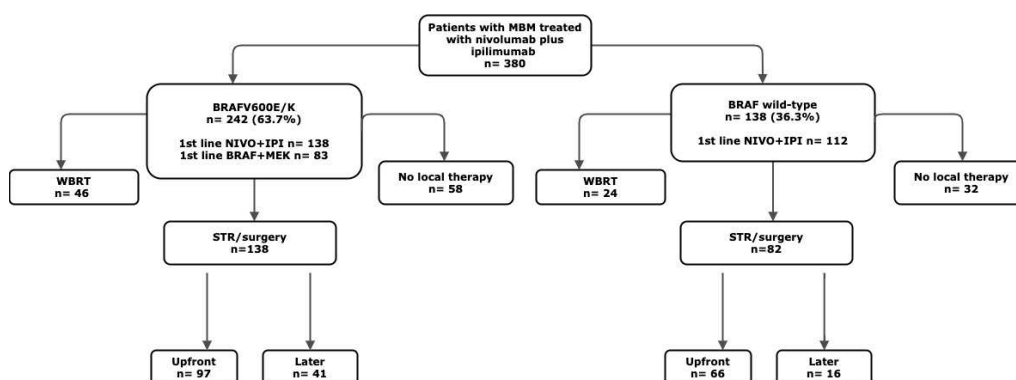

Supplementary figure S1 (Figure S1): flow chart illustrating the number of patients considering BRAF mutation status, the type of first-line of systemic therapy and also the type of local therapy received. STR/surgery upfront means STR/surgery before combined immunotherapy with nivolumab plus ipilimumab, and STR/surgery later means STR/surgery after combined immunotherapy with nivolumab plus ipilimumab. MBM = melanoma brain metastases; NIVO + IPI = nivolumab plus ipilimumab; STR = stereotactic radiotherapy; WBRT = whole brain radiotherapy.

Figure S2

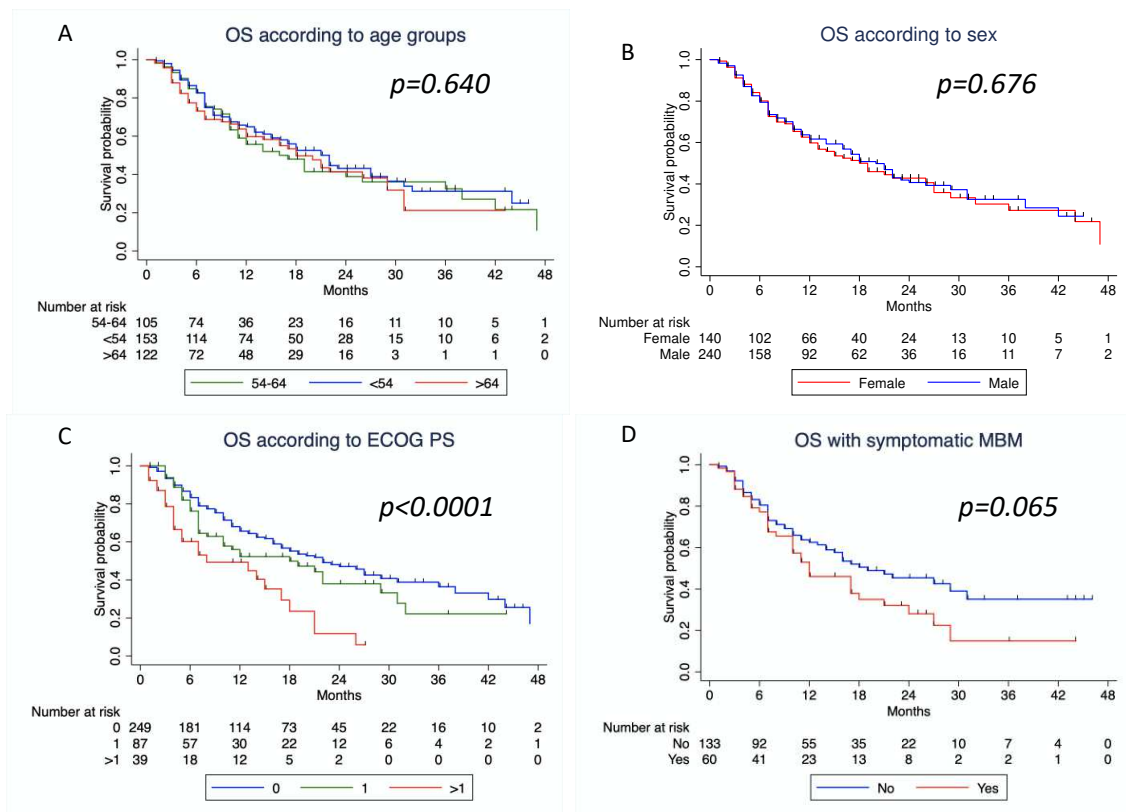

Supplementary figure 2 (Figure S2): Kaplan-Meier curves for overall survival considering: 2-A) age groups; 2-B) sex; 2-C) ECOG performance status; and 2-D) presence of symptoms at the time of combined immunotherapy
